# Supplementary material for: Anti-HERV-K (HML-2) capsid antibody responses in HIV elite controllers
Source: PubMed Central journal article supplement (PMC5568399; doi:10.1186/s12977-017-0365-2), 2017-08-22
Supplement: 12977_2017_365_MOESM2_ESM.pdf [file 12977_2017_365_MOESM2_ESM.pdf]

P E P T I D E A B C D E F G H P E P T I D E A B C D E

Original Sequence

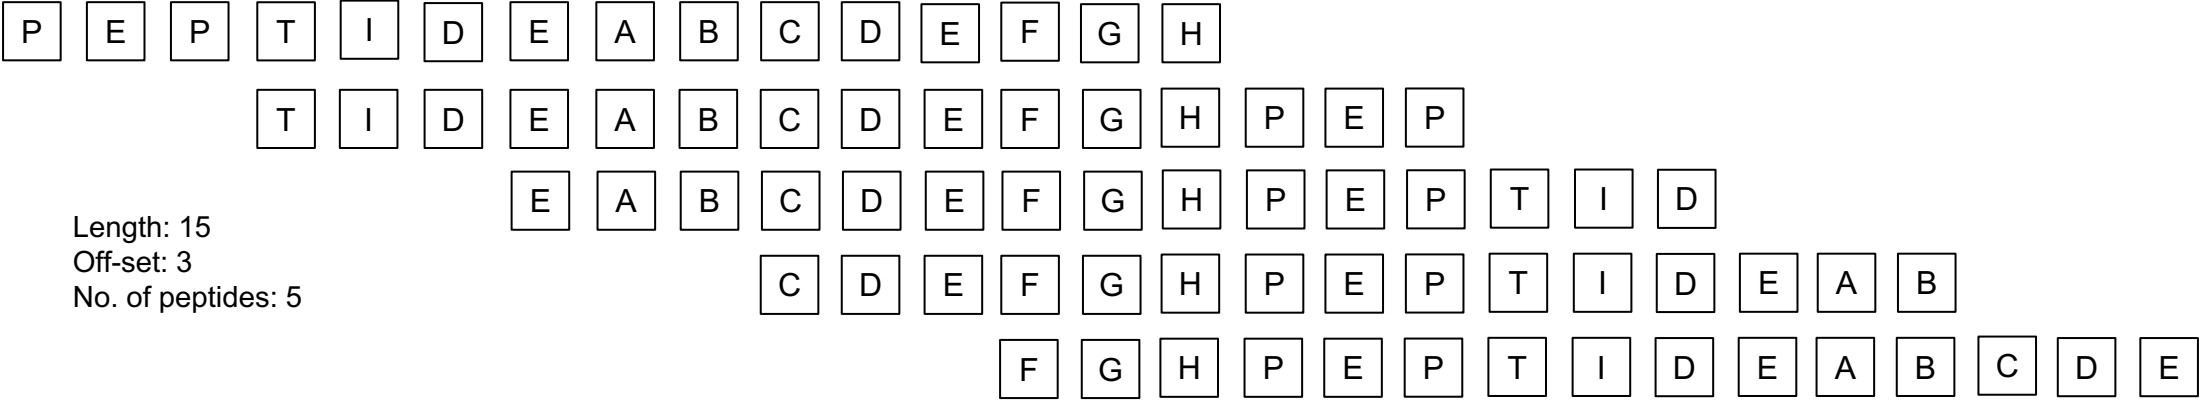

Length: 15  
Off-set: 3  
No. of peptides: 5
